# Supplementary material
Source: publisher figshare collection journal article supplement (https://frontiersin.figshare.com/ndownloader/files/12461309)
Supplement: Supplementary file [file 12461309]

1 **Table S9** | Kyoto Encyclopaedia of Genes and Genomes pathway analysis for red junglefowl and domestic chicken populations using KOBAS  
2 version 3.0<sup>1</sup>.

3 **A. Red Junglefowl population**

| ID       | Description                             | P value     | Genes                                 |
|----------|-----------------------------------------|-------------|---------------------------------------|
| gga04914 | Progesterone-mediated oocyte maturation | 0.033069783 | <i>RPS6KA1, ADCY1, CDC23</i>          |
| gga00230 | Purine metabolism                       | 0.039356647 | <i>ADCY1, ENTPD4, GUCY1A3, NT5C1A</i> |
| gga04270 | Vascular smooth muscle contraction      | 0.049550781 | <i>KCNMA1, GUCY1A3, ADCY1</i>         |

4

5 **B. Ethiopian domestic chicken population**

| ID       | Description                             | P value  | Genes                           |
|----------|-----------------------------------------|----------|---------------------------------|
| gga04080 | Neuroactive ligand-receptor interaction | 0.004583 | <i>AGTR1, TACR3, HRH1, TSHR</i> |
| gga04020 | Calcium signaling pathway               | 0.008034 | <i>AGTR1, TACR3, HRH1</i>       |
| gga04261 | Adrenergic signaling in cardiomyocytes  | 0.041098 | <i>AGTR1, ATP1B3</i>            |

6

7 **C. Saudi Arabian domestic chicken population**

| ID       | Description                          | P value     | Genes                        |
|----------|--------------------------------------|-------------|------------------------------|
| gga04620 | Toll-like receptor signaling pathway | 0.038572949 | <i>TLR7, MAP2K1, MAP3K7</i>  |
| gga04270 | Vascular smooth muscle contraction   | 0.047517517 | <i>KCNMA1, PRKG1, MAP2K1</i> |

8

9 **D. Sri Lankan domestic chicken population**

| ID       | Description                            | P value     | Genes                          |
|----------|----------------------------------------|-------------|--------------------------------|
| gga04261 | Adrenergic signaling in cardiomyocytes | 0.02710155  | <i>ATP2B4, MAPK13, PPP2R2A</i> |
| gga04020 | Calcium signaling pathway              | 0.049582166 | <i>ATP2B4, TACR3, EGFR</i>     |

10

---

<sup>1</sup> <http://kobas.cbi.pku.edu.cn/>
